# Supplementary material for: Size-Resolved Atmospheric Ice Nucleating Particles during East Asian Dust Events
Source: Copernicus journal article supplement (doi:10.5194/acp-2020-678), 2020-09-15
Supplement: Supplementary file [file acp-2020-678-AC2-supplement.pdf]

*The authors are grateful to the editor and referees for their careful reading and constructive suggestions that substantially help to raise the quality of our manuscript. Below we address each of the comments listed in blue font. Our answer is listed in black font and revised text is listed in green font. The number of lines in our answers is based on the revised manuscript, and the amendments were marked with a highlight in the revised version.*

**Referee #2:**

In this manuscript, a study is introduced for which size segregated airborne aerosol samples, sampled during desert dust events in China, were examined concerning the particles ability to act as ice nucleating particle (INP). Besides for the effect of size, also possible contributions from biogenic materials were examined.

The study was well done and is well presented. The results are very timely. I have a few concerns, but nothing really major. Major revisions are only recommended (instead of minor revisions) due to the number of comments. However, after addressing my below comments, the manuscript will very likely be suited for publication in ACP.

We appreciate the referee's affirmation and comments on our work. The comments were responded point-by-point in the following contents, and the manuscript was completely revised. We believe the referee's concerns have been addressed.

**major remarks:**

1. line 23-24: What is the advantage of a size dependent parameterization over a single  $n_s$  curve that could be used with the total surface area of an aerosol? This could be discussed later in the text. Also, you could estimate which error would be done if one used such a single  $n_s$  curve, compared to your higher size resolved information, for which, however, more modeling capacity will be needed.

We thank for the comment.

A single  $n_s(T)$  parameterization treats the freezing activities of all particles as homogeneous, ignoring the differences between different particle sizes. In contrast, size-resolved parameterizations classify particles into categories based on their size

dependent nucleation activity, allowing a better description of the properties of particles, which is particularly suitable for mineral dust.

We added a discussion as below:

“Compared with mineral composition-based parameterizations, the advantage of particle size-based curves is that we do not need to know the complex mineralogical composition of dust. Only the particle size distribution, a widely monitored parameter, is required in size-based prediction. Furthermore, there is a vertical distribution of mineral dust in the atmosphere (Maki et al., 2019), implying potential different contributions of these various size particles in cloud formation. Our size dependent parameterizations can provide more refined simulation and prediction in theory, which needs to be confirmed in further model studies.” (L363-368)

2. section 2.1: You do discuss losses in a MOUDI a bit. But I still wonder if the filters put on the MOUDI-stages did not change the collected sizes, as this is sensitive to the distance between the plates. Also, the filters are much larger than the collection area of a MOUDI - were the filters cut or how was this issue dealt with? And how were they kept in place?

We thank for this comment.

It is really important to ensure that the jet-to-plate distance is the same as the design. According to the handbook, the MOUDI was designed for and calibrated with 0.001 inches (i.e., 0.0254 mm) thick substrate material. The polycarbonate filters (47 mm Nuclepore, Track-Etch Membrane, 0.2  $\mu\text{m}$  pores, Whatman) are thin ( $\sim 0.02$  mm) so they do not affect the impactor jet-to-plate distances.

The impaction plates are 47 mm in diameter and the substrates are 47 mm as well. Thus, no need to cut the filters. As shown in Fig. R2.1, a polycarbonate filter is clamped into the holder by the hold-down ring. All these operations are carried out in strict accordance with the instrument manual.

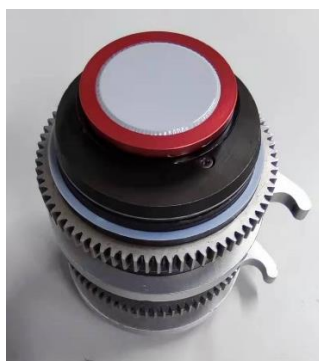

Figure R2.1. Photograph of a collection plate fixed with a polycarbonate filter

3. line 149: It is clear that either diameters as measured by the SMPS needed to be adapted, or the aerodynamical diameters as measured by APS and as selected by MOUDI. But without checking literature thoroughly, I would have expected that geometrical diameter is the one most previous studies referred to, not aerodynamic diameter, when retrieving  $n_s$ . Please check this and give an estimation of the deviation this may cause.

We gratefully thank the referee for such important point and followed the comment. The particle diameter (i.e., particle surface area) is a main uncertainty source for the calculation of surface ice active site density, and the diameter should be specified when comparing the  $n_s(T)$  values among different studies.

We searched the classical literatures on  $n_s(T)$  calculation, including the papers by earlier definers and the papers commonly used to compare parameterizations. Several different measurement methods were used to determine the specific surface area in previous studies, such as particle mobility (Connolly et al., 2009; Niemand et al., 2012), gas adsorption (BET, Hiranuma et al., 2015; Atkinson et al., 2013), laser diffraction (Atkinson et al., 2013), and dynamic light scattering (DLS, Hiranuma et al., 2014), and optical probe (Price et al., 2018) techniques. Two main diameters, geometric and BET-inferred diameters (derived from BET-inferred surface area by some assumptions), were adopted in calculating  $n_s(T)$ , although some studies did not mention which particle sizes they used. It is clear that the BET-inferred surface area is typically larger than simplified spherical estimation, resulting in a lower  $n_s(T)$  value if employed (Hiranuma et al., 2015).

On the one hand, some studies explicitly converted the particle size to geometric diameter. Niemand et al. (2012) converted both the aerodynamic and equivalent mobility diameter into a volume equivalent sphere diameter (i.e., geometric diameter, assuming that the bulk density is 2.6 g cm<sup>-3</sup> and the dynamic shape factors are between 1.1 and 1.4). Hiranuma et al. (2014) converted the aerodynamic diameter to a volume equivalent diameter to calculate the geometric total surface area.

On the other hand, some studies used other particle sizes or ignored the differences between particle sizes. Connolly et al. (2009) measured the dust particle size distribution by SMPS, and did not talk about the conversion of stokes diameter when calculating the ice-active surface site density (IASSD). Hoose and Möhler (2012) summarized previous studies and neglected the deviations when the reported size is the mobility diameter instead of the geometric diameter in their calculation and comparison. Atkinson et al. (2013) used a laser diffraction technique to get the specific surface area, which was 3.5 times smaller than that determined by BET. We evaluated the bias of the results calculated using aerodynamic and geometric diameter. The geometric diameter can be converted from its aerodynamic diameter as:

$$D_{ae} = D_g \sqrt{\frac{\rho_p C_g}{\rho_0 C_{ae} \chi}}$$

where  $D_{ae}$  is aerodynamic diameter,  $D_g$  is geometric diameter (i.e., the volume equivalent diameter),  $\rho_0$  is unit density (1 g cm<sup>-3</sup>),  $\rho_p$  is the particle density,  $\chi$  is the dynamic shape factor,  $C_g$  and  $C_{ae}$  are the Cunningham slip correction factors associated with the geometric and aerodynamic diameters, respectively.

Table R1.1. The deviation of calculations between the geometric and aerodynamic diameters

| $\rho_p$ (g<br>cm <sup>-3</sup> ) | $\chi$ | $D_{ae}$ | $D_g$ | $n_s(T)^a$ |
|-----------------------------------|--------|----------|-------|------------|
|-----------------------------------|--------|----------|-------|------------|

|     |     |          |                     |                           |                           |
|-----|-----|----------|---------------------|---------------------------|---------------------------|
| 2.6 | 1.1 | $D_{ae}$ | $D_g = 0.65 D_{ae}$ | $n_{s,g} = 2.36 n_{s,ae}$ | $n_{s,ae} = 0.42 n_{s,g}$ |
| 2.0 | 1.1 | $D_{ae}$ | $D_g = 0.74 D_{ae}$ | $n_{s,g} = 1.82 n_{s,ae}$ | $n_{s,ae} = 0.55 n_{s,g}$ |
| 1.8 | 1.1 | $D_{ae}$ | $D_g = 0.78 D_{ae}$ | $n_{s,g} = 1.64 n_{s,ae}$ | $n_{s,ae} = 0.61 n_{s,g}$ |
| 1.5 | 1.1 | $D_{ae}$ | $D_g = 0.86 D_{ae}$ | $n_{s,g} = 1.36 n_{s,ae}$ | $n_{s,ae} = 0.74 n_{s,g}$ |
| 2.6 | 1.4 | $D_{ae}$ | $D_g = 0.73 D_{ae}$ | $n_{s,g} = 1.86 n_{s,ae}$ | $n_{s,ae} = 0.54 n_{s,g}$ |
| 2.0 | 1.4 | $D_{ae}$ | $D_g = 0.84 D_{ae}$ | $n_{s,g} = 1.43 n_{s,ae}$ | $n_{s,ae} = 0.70 n_{s,g}$ |
| 1.8 | 1.4 | $D_{ae}$ | $D_g = 0.88 D_{ae}$ | $n_{s,g} = 1.29 n_{s,ae}$ | $n_{s,ae} = 0.78 n_{s,g}$ |
| 1.5 | 1.4 | $D_{ae}$ | $D_g = 0.97 D_{ae}$ | $n_{s,g} = 1.07 n_{s,ae}$ | $n_{s,ae} = 0.93 n_{s,g}$ |

<sup>a</sup>  $n_{s,g}$  and  $n_{s,ae}$  are the surface ice active site densities associated with the geometric and aerodynamic diameters, respectively.

Table R1.1 shows the results of calculations using different particle densities ( $\rho_p = 1.5 - 2.6 \text{ g cm}^{-3}$ ) and dynamic shape factors ( $\chi = 1.1 - 1.4$ , Niemand et al., 2012) when the slip correction factor is not considered. At a given particle density and dynamic shape factor,  $D_g$  is 0.65 to 0.97 times  $D_{ae}$ , and  $n_{s,g}$  is 1.07 to 2.36 times  $n_{s,ae}$ . Therefore, our  $n_s(T)$  derived from the aerodynamic diameter is 0.42 to 0.93 times the value of  $n_s(T)$  determined by the converted geometric diameter.

We choose to use the aerodynamic diameter rather than the converted geometric diameter to derive the  $n_s(T)$  values for three reasons. First, the conversion between aerodynamic and geometric diameters requires knowledge of particle density and shape factor. However, the above two parameters are associated with the chemical composition, diameter and morphology of particles, and cannot be measured directly. There is large uncertainty when using estimated fixed values. In fact, the Cunningham slip correction factor, which is often neglected in calculations, is also an important factor for particles smaller than 1  $\mu\text{m}$ . Second, the determination of geometric diameter is influenced by the wavelength of the measuring instrument. Third, the airborne particles collected in our measurement were mixed particles rather than pure mineral dust, and the size distribution was mainly detected by APS. We think the uncertainty would be reduced to the greatest

extent when using the aerodynamic particle size in calculation.

In a word, we use the aerodynamic diameter in calculating  $n_s(T)$ , and note that the uncertainty should be borne in mind when comparing our data with other studies. A related statement is added in the revised manuscript and Supplementary Information: “Note that aerodynamic diameter was used in the calculation of  $n_s(T)$ , which is 0.42 to 0.93 times the value of  $n_s(T)$  determined by the converted geometric diameter (see the SI for more details).” (L133-134)

#### References:

- Atkinson, J. D., Murray, B. J., Woodhouse, M. T., Whale, T. F., Baustian, K. J., Carslaw, K. S., Dobbie, S., O'Sullivan, D., and Malkin, T. L.: The importance of feldspar for ice nucleation by mineral dust in mixed-phase clouds, *Nature*, 498, 355-358, 10.1038/nature12278, 2013.
- Connolly, P. J., Möhler, O., Field, P. R., Saathoff, H., Burgess, R., Choulaton, T., and Gallagher, M.: Studies of heterogeneous freezing by three different desert dust samples, *Atmos. Chem. Phys.*, 9, 2805-2824, 10.5194/acp-9-2805-2009, 2009.
- Hiranuma, N., Hoffmann, N., Kiselev, A., Dreyer, A., Zhang, K., Kulkarni, G., Koop, T., and Möhler, O.: Influence of surface morphology on the immersion mode ice nucleation efficiency of hematite particles, *Atmos. Chem. Phys.*, 14, 2315-2324, 10.5194/acp-14-2315-2014, 2014.
- Hiranuma, N., Augustin-Bauditz, S., Bingemer, H., Budke, C., Curtius, J., Danielczok, A., Diehl, K., Dreischmeier, K., Ebert, M., Frank, F., Hoffmann, N., Kandler, K., Kiselev, A., Koop, T., Leisner, T., Mohler, O., Nillius, B., Peckhaus, A., Rose, D., Weinbruch, S., Wex, H., Boose, Y., DeMott, P. J., Hader, J. D., Hill, T. C. J., Kanji, Z. A., Kulkarni, G., Levin, E. J. T., McCluskey, C. S., Murakami, M., Murray, B. J., Niedermeier, D., Petters, M. D., O'Sullivan, D., Saito, A., Schill, G. P., Tajiri, T., Tolbert, M. A., Welti, A., Whale, T. F., Wright, T. P., and Yamashita, K.: A comprehensive laboratory study on the immersion freezing behavior of illite NX particles: a comparison of 17 ice nucleation measurement techniques, *Atmospheric Chemistry and Physics*, 15, 2489-2518, 10.5194/acp-15-2489-2015, 2015.
- Hoose, C., and Mohler, O.: Heterogeneous ice nucleation on atmospheric aerosols: a review of results from laboratory experiments, *Atmospheric Chemistry and Physics*, 12, 9817-9854, 10.5194/acp-12-9817-2012, 2012.

- Niemand, M., Möhler, O., Vogel, B., Vogel, H., Hoose, C., Connolly, P., Klein, H., Bingemer, H., DeMott, P., Skrotzki, J., and Leisner, T.: A Particle-Surface-Area-Based Parameterization of Immersion Freezing on Desert Dust Particles, *Journal of the Atmospheric Sciences*, 69, 3077-3092, 10.1175/jas-d-11-0249.1, 2012.
- Price, H. C., Baustian, K. J., McQuaid, J. B., Blyth, A., Bower, K. N., Choullarton, T., Cotton, R. J., Cui, Z., Field, P. R., Gallagher, M., Hawker, R., Merrington, A., Miltenberger, A., Neely Iii, R. R., Parker, S. T., Rosenberg, P. D., Taylor, J. W., Trembath, J., Vergara-Temprado, J., Whale, T. F., Wilson, T. W., Young, G., and Murray, B. J.: Atmospheric Ice-Nucleating Particles in the Dusty Tropical Atlantic, *Journal of Geophysical Research: Atmospheres*, 123, 2175-2193, 10.1002/2017jd027560, 2018.

4. line 170 ff: The description of the definition of the dust events needs to be adjusted: from Table 1, it seems that it was based on CMA observations, only. Otherwise M5, D6 and D7 would also not be dust events.

We thank the referee for this comment.

The definition of dust events was based on the combined result of 4 factors: PM<sub>10</sub> mass concentration (larger than 200 µg m<sup>-3</sup> lasting more than 2 hours for dust events), the volume concentration of coarse mode particles (mean concentration higher than 75 µm<sup>3</sup> cm<sup>-3</sup> for dust events), phenomenological dust storm observations operated by China Meteorological Administration (CMA, being reported as the largescale dust events), and the concentration of aluminium (Al) element. Only some important information was given in Table 1, and more detailed determination criteria were discussed in Table R1.2.

The average PM<sub>10</sub> mass concentrations of sample M5, D6 and D7 were not as high as that of other samples. A determination criterion of dust events is, however, that PM<sub>10</sub> mass concentration was larger than 200 µg m<sup>-3</sup> for more than 2 hours. In addition, aluminium (Al) is usually selected to be an indicator of mineral dust, and the concentration of Al is much higher in dust events than in non-dust event (M4). Therefore, we think sample M5, D6 and D7 would also be dust events.

We presented these detailed discussions in the Supplementary Information and

added a description in the revised manuscript:

“... (see Table S1 in the SI for more detailed determination criteria).” (L181)

Table R1.2. The criteria used to distinguish between dust and non-dust events for 14 sets of samples (Table S1).

The two weather conditions, i.e., dust and non-dust events, were defined based on PM10 mass concentration (PM10 Mass Conc.), the volume concentration of coarse mode particles (Vol. Conc.), phenomenological dust storm observations operated by China Meteorological Administration (Observations by CMA), and the concentration of aluminium (Al).

| Sample ID | PM <sub>10</sub> Mass Conc. <sup>1</sup> | Vol. Conc. <sup>2</sup> | Observations by CMA <sup>3</sup> | Concentration of Al element (µg m <sup>-3</sup> ) <sup>4</sup> | Weather condition     |
|-----------|------------------------------------------|-------------------------|----------------------------------|----------------------------------------------------------------|-----------------------|
| M1        | True                                     | True                    | True                             | 5.65                                                           | Dust                  |
| M2        | True                                     | True                    | True                             | 1.68                                                           | Dust                  |
| M3        | True                                     | True                    | True                             | 0.72                                                           | Dust                  |
| M4        | True                                     | False                   | False                            | 0.04                                                           | Non-dust <sup>5</sup> |
| M5        | True                                     | False                   | True                             | 0.12                                                           | Dust                  |
| M6        | True                                     | True                    | True                             | 1.45                                                           | Dust                  |
| M7        | True                                     | True                    | True                             | 1.07                                                           | Dust                  |
| M8        | True                                     | True                    | True                             | 1.01                                                           | Dust                  |
| D2        | True                                     | True                    | True                             | 0.14                                                           | Dust                  |
| D3        | True                                     | True                    | True                             | 0.77                                                           | Dust                  |
| D4        | True                                     | True                    | True                             | 0.39                                                           | Dust                  |
| D5        | True                                     | True                    | True                             | 0.59                                                           | Dust                  |
| D6        | False                                    | False                   | True                             | 0.13                                                           | Dust                  |
| D7        | True                                     | False                   | True                             | 0.17                                                           | Dust                  |

Note: The weather condition of each sample was defined by a combination of the above 4 factors.

<sup>1</sup> PM<sub>10</sub> mass concentration: ‘True’ was defined as PM<sub>10</sub> mass concentration larger than



200  $\mu\text{g m}^{-3}$  for more than 2 hours.

<sup>2</sup> The volume concentration of the coarse mode particles ( $> 1 \mu\text{m}$ ): ‘True’ was defined for mean concentration higher than  $75 \mu\text{m}^3 \text{cm}^{-3}$ . The threshold was developed based on the measurements of 2004-2006 in Beijing. Asian dust loading has declined in recent years. Thus, this threshold is not mandatory.

<sup>3</sup> Phenomenological dust storm observations: China Meteorological Administration (CMA) provides predictions and observations on dust storm events that occurred in China. The dust events in Beijing identified in this study have been reported as the largescale dust storm events.

<sup>4</sup> Aluminium (Al) is usually selected to be an indicator of mineral dust because it is one of the most abundant constant elements in deserts. Thus, the concentration of Al is considered as an important factor to define dust events.

<sup>5</sup> Sample M4 was collected from the end of a continuous dust storm (M1, M2, and M3), i.e., during the removal process after a dust storm. High wind speeds can blow up large particles from the roads and other surfaces in the city. In addition, the air mass of M4 passed through the Bohai Sea before arriving in Beijing (Fig. S1), possibly bringing large marine particles. Although the average concentration of  $\text{PM}_{10}$  for sample M4 was higher than those of samples M5 and D6, the concentration of Al in sample M4 was much lower compared to sample M5 and D6. Therefore, we classify sample M4 as a non-dust event, since it’s not dominated by mineral dust.

5. lines 175ff: Were results from M4 included in this study at all? If yes, how? If not, why mention it? And why are M1, M2, M3 and M4 described here explicitly, but not all the other samples? A sentence or two on the samples, even if they are only summarized in groups, would be helpful, so that for each sample its specifics are clearer (like the one found in line 214 - you can repeat some of that information there again, but also add it here).

We agree with the referee and added some content in the revised manuscript.

The results of M4 (non-dust event) were only shown in Table 1 and Fig. 2 (a) as a comparison with the dust events. The sample M4 triggered freezing at much lower

temperatures than that in the dust events (see Fig. 2 (a)), indicating that mineral dust particles are efficient INPs.

Only a non-dust sample (i.e., M4) was collected in our experiment, that is why we discussed it separately here. However, such a description does cause unnecessary confusion to the reader. We followed the comment, added an overview of the samples, and rephrase the description about M4:

“Seven and 6 dust samples were collected in 2018 (M1, M2, M3, M5, M6, M7 and M8) and in 2019 (D2, D3, D4, D5, D6 and D7), respectively. Sample M4 was sampled from the end of a continuous dust storm period (M1, M2 and M3), and its air mass passed through the Bohai Sea before arriving in Beijing (see Fig. S1 in the SI). Therefore, sample M4 was not dominated by mineral dust, and it was classified as a non-dust event.” (L181-185)

6. line 178: The data shown in Fig. 1 in “pale yellow” - are they all for size segregated filters? If so, why is the set of colorfully depicted data well above these curves for the three large particle sizes? If this colorfully depicted data-set is one with particularly high ice activity, mention this explicitly.

We thank the referee for this comment.

The data shown in Fig. 1 in “pale yellow” are all the results of size-resolved filters. And this colorfully depicted data-set is a set of high ice active sample, which is a subset of the collected “pale yellow” samples. We rephrased the sentences to clarify the statement:

“Results of all freezing curves containing size-resolved airborne dust particles are presented in pale yellow in Fig. 1. Each curve corresponds to one sampled filter collected in dust events.” (L186-187)

“Frozen fraction curves from sample M1, a set of high ice active samples in the collected samples, are also shown in Fig. 1, and each color depicts a different size class ranging from 0.18 to 10.0  $\mu\text{m}$ .” (L189-191)

“The collected size-resolved filter measurements are marked in pale yellow (named “Collected samples”), ... As a subset of the “Collected samples”, a set of filters

(sample M1) ranging from 0.18 to 10.0  $\mu\text{m}$  are marked with different colors to illustrate the frozen fraction curves for size-resolved particles.” (L715, the caption of Fig. 1)

7. Line 183-185: Based on  $f_{ice}$  curves, it cannot be judged which size class is more ice active. It is theoretically possible that there are just so many more (or less) particles in one size class than in others, so that this number is the overwhelming influence on the overall measured ice activity at that impactor stage, causing high (or low)  $f_{ice}$ . I suggest that you at least mention this in an additional sentence.

We agree with the referee that it cannot be judged which size class is more ice active based on  $f_{ice}(T)$  curves. But at least, it clearly shows that there are indeed differences for different size particles. As suggested, we added the discussion about the number concentration of particles when analyzing the freezing curve:

“On the whole, large particle samples froze at higher temperatures, while smaller size samples froze at lower temperatures, indicating different ice nucleating abilities. Note that the effect of particle number size distribution on the frozen fraction curves needs to be considered, because  $f_{ice}(T)$  is sensitive to the number of particles at a given size class.” (L192-194)

8. line 194-195: “For mineral dust particles, their freezing temperatures were similar.” Do you mean that the dust curves were all similar? That is not true, and you should normalize to dust surface area first before you make comments on that, anyway. You even mention that in the next sentences. This sentence here needs to be deleted or revised.

We thank the referee for this comment.

Sorry for the misunderstanding caused by this sentence. What we want to express is that the initial freezing temperatures of the dust samples were similar ( $\sim -6$  °C), not that the freezing curves were similar. The sentence has been rephrased in the revised version:

“For mineral dust samples, their initial freezing temperatures were similar ( $-6 \pm$

1 °C).” (L203-204)

9. line 203: Fig. 2 (b): Is this based on one sample, or an average from all? Mention this! And again, it might make more sense to show this for size-normalized data, but number is fine, here, too.

We followed the comment and added related description of Fig. 2 (b).

The results in Fig. 2 (b) are based on the average from 13 dust dominated samples, and detailed information is given in Table S2 in the SI. This content has been added: “The trend of  $N_{INP}$  with temperature and particle size based on 13 mineral dust-dominated samples is depicted in Fig. 2 (b), where the size-resolved  $N_{INP}$  ranged from  $10^{-2}$  to  $10^1$  L<sup>-1</sup> of standard air (see Table S2 in the SI for more detailed information).” (L212-213)

“Bars represent the average  $N_{INP}$  of 13 dust-dominated samples.” (L725, the caption of Fig. 2)

The size-normalized data was shown in Fig. 7 (a), i.e., the surface ice active site densities for different size classes. Thus, we chose to show the size-resolved  $N_{INP}$  in Fig. 2 (b).

10. line 214: Why did you choose to only show results for this subset of samples? This needs to be justified in the text, otherwise the impression could arise that you did “cherry picking”, i.e., only displaying those samples that fit what you want to see.

When discussing the difference of INPs between two transport pathways, 4 samples (M6, M7, M8 and D7) were thought to be from the northwest pathway and 3 samples (M3, M5 and D6) were classed as coming from the northern area. As shown in Fig. R2.2, the trajectories of the above 7 samples (solid red and blue lines) were relatively concentrated and can be well distinguished from each other. The transport trajectories of other 6 dust-dominated samples (M1, M2, D2, D3, D4 and D5, solid green lines) were mainly distributed in the middle between northwest and north pathways, and they were difficult to be classed into anyone pathways. To make the

results more concise and focus on the comparison of the two pathways, we only showed the above 7 samples, and the remaining samples were not given in Fig. 3. Now, Fig. R2.2 was added into the SI, and the following sentence was added in the text:

“Other six samples (M1, M2, D2, D3, D4 and D5) were not followed these two pathways (see Fig. S2 in the SI), and will not be discussed in this section.” (L226-227)

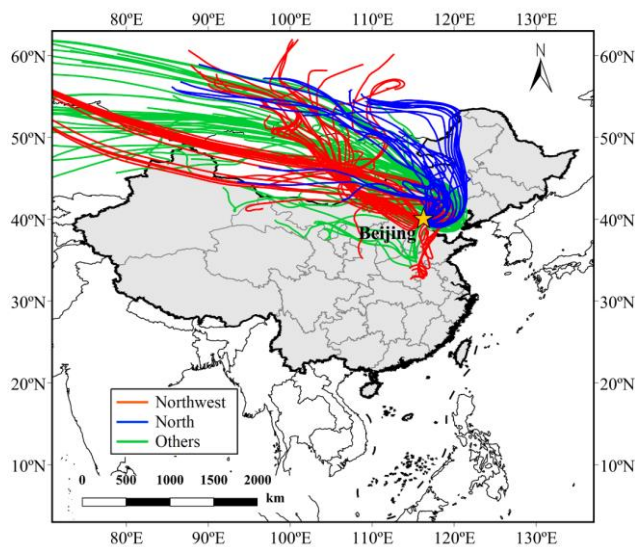

Figure R2.2. (Fig. S2) Air mass trajectories for different samples originated from the northwest (M6, M7, M8 and D7; solid red lines), north (M3, M5 and D6; solid blue lines) and other (M1, M2, D2, D3, D4 and D5; solid green lines) transport pathways.

11. line 215: Is Sample D7 included in Fig. 3 (b)? To me, only 6 curves are visible in Fig. 3 (b), too. Please check, and if D7 is not included, mention this in the text.

Sample D7 is indeed included in Fig. 3 (b), this curve, however, is overlapped with the other three samples. We recolored the sample D7 to green in Fig. R2.3 (only the color of sample D7 is different from that in Fig. 3 (b)). It is clearly shown that the 4 northwest samples are very similar, and there are 7 curves in this figure.

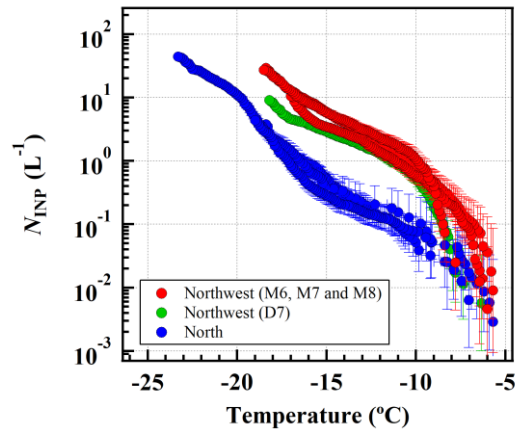

Figure R2.3. INP concentrations compared for the northwest and north pathways (different from that in Fig. 3 (b), sample D7 is colored by green).

12. line 217: The airborne INP concentration depends on getting dust suspended in the air. So even the same source region can yield different airborne concentrations for different conditions such as changing wind speed. Mention this additional restriction. Different shapes, however, really depict different types of INP. (Like, based on what you describe later, a biogenic component in the “red” samples.)

We agree with the referee that the collected dust samples from the same source region might yield different INP concentrations due to varying atmospheric transport conditions.

We followed this constructive comment and added some discussion about it:

“..., indicating that there might be differences in the types of INPs. However, we need to keep in mind that due to the influence of factors such as changing wind speed during the transport process, the atmospheric concentration of dust from the same source region may be different, leading to a varying concentration of atmospheric INPs.” (L230-233)

13. line 233: Concerning Fig. 4 (a) and (b), it seems as if here only 10 different datasets are shown. Is that correct, and if yes, why were the other data not shown? This is in line with my comment concerning line 214.

We thank the referee for his/her careful reading.

Eleven dust datasets are shown in Fig. 4 (a) and (b), and the results for sample D5 and D7 are not given. As described in L224, the size distribution data of sample D7 are partially missing so that surface area could not be fully derived. The surface area of particles in sample D5 might be overestimated, thus we decided not to use it in further calculation about  $n_s(T)$ . Therefore, 11 dust samples are included when discussing surface ice active site density of dust particles.

We have added this in the revised version:

“In the present study, the total  $n_s(T)$  values (11 dust samples without sample D5 and D7) span...” (L250)

14. line 235: It would be more informative to mention the temperature span at a single temperature, as this overall span depends on the measurement method you use! (It varies with the amount of air you collect, the surface area (hence the size distribution) and, to a lesser extent, to the number of droplets you examine, but NOT on any characterization of the INP.)

We agree with the referee that it is more rigorous to describe the temperature range at a single temperature. It has been modified in the revised manuscript:

“... span 2 orders of magnitude from  $10^5$  to  $10^7$  m<sup>-2</sup> at -15 °C.” (L250)

15. line 286: Again, why is only a subset of all 14 sets of filter samples shown?

Figure 6 is plotted to compare the effect of heat treatment on freezing properties of northwest and north samples, so that only 4 northwest and 3 north datasets are shown. Please see our responses to the tenth and eleventh major remarks.

16. line 292-293: “This may suggest that after heat-sensitive INPs was removed, the two transport pathways are now dominated by similar material, which is probably mineral dust.” I totally agree - but that makes any discussion of different feldspar contents, which you did above, futile. Please check the content of the text for consistency! Or, when you mention feldspar, already point out that this may not be important as the importance of the biogenic content will be discussed below.

We followed the comment and rephrase the sentence:

“This may suggest that after heat-sensitive INPs were removed, ... mineral dust. However, it should be noted that the nucleation activity of all northwest samples was higher than that of the north samples, suggesting that there might be a difference in mineral composition (e.g., feldspar content), although it was far less important than the contribution of biological materials.” (L310-313)

17. line 299-300: What does that sentence refer to (in Sect. 3.3)? Please explain what you mean.

Three hypotheses are proposed in Sect. 3.3 to explain why samples in this study were more active for temperatures above  $-15^{\circ}\text{C}$ , and the contribution of biological materials is an important factor. Sect. 3.4 confirmed the contribution of heat-sensitive INPs (mostly attributed to proteinaceous biological materials).

The sentence has been modified:

“This conclusion also confirms the hypotheses in Sect. 3.2 and 3.3, i.e., biological materials made a substantial contribution to ice nucleation activity above  $-15^{\circ}\text{C}$ .” (L320-321)

18. line 223ff: My advice is to not overinterpret such observations. There are measurement uncertainties on all of these curves, and there are different approaches. The  $n_s$  derived in a lab-study from mineral dust samples refers to the surface area of dust particles, only, while in your study, you naturally have to refer to the surface area of the total aerosol. Also, you used the aerodynamic diameter as the reference, while this, to my understanding, was not the case in the other studies. So please be careful when discussing such details.

We agree with the referee and reorganized Sect. 3.5 completely as suggested.

Only the paragraph describing the uncertainties is given below. Please see the revised manuscript for complete modification.

“We note that the quantitative mineralogical composition was not investigated in this study, so that we cannot explain the discrepancy accurately in terms of mineral



composition. On the other hand, while relatively minor, measurement and calculation uncertainties should be borne in mind when comparing our parameterizations with other curves as well. First, different experimental methods introduce measurement errors. A cold stage-based technique was applied in this study, while cloud simulation chamber (Niemand et al., 2012), laminar flow tube (Niedermeier et al., 2015) and many other cold-stage instruments (with varying size/volume droplets; Atkinson et al., 2013; Harrison et al., 2019; Reicher et al., 2019) were used to measure the activated fractions of tested particles/droplets at a given temperature. Then, the investigated particles came from various sources and underwent different processing, including airborne-collected, surface-collected (sieved or milled) samples, and single mineral dust components. Next, the calculation of  $n_s(T)$  depends on a key parameter, particle surface area, which refers to the surface area of dust particles in laboratory studies, while refers to the surface area of total aerosol particles in this study and in R19. Furthermore, we adopted aerodynamic diameter to obtain  $n_s(T)$ , which underestimated the result (0.42 to 0.93 times) compared with that determined by the converted geometric diameter.” (L347-358)

19. line 333-335: How does that fit with the fact that you see such a high biogenic / proteinaceous fraction being responsible for the ice activity at higher temperatures??? Also: The deviation can be seen at high temperatures, where your fits are much above the mineral-dust parameterizations - mention that explicitly. Also: Fitting a straight line over such a broad T-range might be misleading.

We thank the referee for this comment.

Dust storms in East Asia are mainly concentrated in spring, when the plants germinate, grow and bloom. Our experimental results confirmed the biological contributions to ice nucleation activity of East Asian dust, especially at higher temperatures. Compared with reference single mineral, our airborne dust samples are more representative and can better reflect the INP characteristics of the actual atmosphere. The contribution of seasonal biological components should be

concerned, so that we chose to use the data containing biological materials rather than the after-heated dataset to fit the parameterizations.

For the straight-line fitting, first of all, this method is a reasonable simplification and has been widely adopted in previous studies (Niemand et al., 2012; Ullrich et al., 2017). Then, the goodness of fit index in our study is fairly good. We also agree with the referee that a more comprehensive and complicated fitting could be used in further studies.

20. line 340-341: As said above, this temperature range rather characterizes your method than saying anything about the INP. Give the span at a single temperature, as this signifies who different your different samples were.

We followed the comment and modified the similar statement about  $n_s(T)$  throughout the manuscript.

“The total surface ice active site density,  $n_s(T)$ , spanned 2 orders of magnitude from  $10^5$  to  $10^7$  m<sup>-2</sup> at -15 °C.” (L373)

21. line 346: “the common effect of the activity” - what do you mean by that. This could be elaborated somewhat more, maybe even in an additional sentence.

INP concentrations depend not only on the activity of particles in a specific size range, but also on the total number concentration of the same size particles. Therefore, the INP concentrations first increased rapidly with increasing particle size, and then levelled.

“Although larger particles had higher  $n_s(T)$ , their atmospheric number concentration was much less than that of fine particles, i.e., INP concentrations depend on the combined effect of both individual particle’ activity and the particle number at a given size.” (L378-380)

22. line 350: Is that really what you find. You argued with different feldspar content at some point, then with different biogenic content, and now you summarize all this in saying “all desert dusts are the same”. Make the message of your text consistent

throughout the manuscript.

Corrected.

“We also demonstrated that the differences of both the total and size-resolved  $n_s(T)$  values of natural mineral dust particles from East Asia, North Africa, and Eastern Mediterranean are within 1 to 2 orders of magnitude, suggesting similarities in ice nucleation activity.” (L380-382)

23. line 362ff: “Larger particles are more active INPs, as particle size reflects the mineral composition to a large extent” - This is not necessarily true. If larger particles have a higher  $n_s$ , then it's true, but in general larger particles are more ice active because they have a larger surface area. Formulate this with more care.

Modified.

“Larger particles are normally more active INPs, as large particles have a higher  $n_s(T)$  or a larger surface area” (L395)

#### **Technical issues and minor remarks:**

1. line 29: “relatively high temperatures” - say more precisely what you mean by that.

We followed the comment and rephrased the sentence:

“Mineral dust particles can act as ice nucleating particles (INPs) that trigger heterogeneous ice nucleation at relatively high temperatures and low relative humidities by providing nucleation surfaces to efficiently lower the energy barrier of critical ice embryo formation” (L28-30)

2. line 37: What exactly do you mean by “mid-level clouds”. The use of “mixed-phase clouds” (as in the next sentence) seems more appropriate here.

We followed the referee's comment and replaced the “mid-level clouds” by “mixed-phase clouds” (L37).

3. line 52: “supplement for feldspar” - it is not clear what you mean, here. That the

two always occur together? That would not be correct, as feldspars are weathered clay minerals, and quartz is not a clay mineral. Please check and reword.

When explaining the ice nucleation process of dust from the perspective of mineral components, quartz is considered to be less active than feldspars, but it is also important to explain the freezing observed at lower temperatures.

The sentence has been modified:

“As a major component in mineral dust, quartz is important to explain the freezing observed at lower temperatures, although it is less active than feldspars” (L52-53)

4. line 91: “stages ... were detected” - wrong wording, needs to be changed.

We followed the referee’s comment and rephrased the sentence as the suggestion from referee #1:

“We used stages 1 to 8 of the MOUDI with cut-points ( $D_{50}$ ) ranging from 10 to 0.18  $\mu\text{m}$  in aerodynamic diameters at a flow rate of 30  $\text{L min}^{-1}$  in this study.” (L92-93)

5. line 108: Are you aware of the fact that the use of ultrasonic waves may change the structure of proteins and therewith change their functionality? (see. e.g., DeLeo et al., 2016) At least mention this in your text, so that future readers know about this issue when they consider repeating what you did.

We thank the referee for this comment and added the caution in the revised version:

“Note that the ultrasonic waves may influence the properties and function of proteins and change their bioactivity (De Leo et al., 2017).” (L112-113)

6. line 115: change “will not be expected and” to “is not”.

Changed (L118).

7. line 120: This is the first time that active sites are mentioned, so you may want to add a few words on explaining what you mean by that.

We followed the comment and added a short introduction on ice active sites:

“Ice active sites are the preferred locations for ice nucleation on an INP, and ...”

(L123)

8. line 138: “Gross” seems a bit misplaced here. I suggest to use a different word. Or, as you use “gross” more often, what you mean by that.

We followed the comment and replaced “gross” by “total” in the revised manuscript (L144, 235, 248, 249, 256, 262, 373, 380 and 733).

9. line 287: Change “originated” -> “originating”.

Changed (L303).

10. line 289: “For example,  $N_{INP}$  near temperature at -10 °C.” This is not a complete sentence - check and correct.

Modified.

“... in some of the cases (e.g.,  $N_{INP}$  at  $\sim -10$  °C).” (L306)

11. Fig. 2: “b” is missing in the legend for Chen et al. (2018b). Also, change the color either for the Bi et al. (2019) datapoint, and/or make it an open symbol (maybe an open star?), as it is difficult to discriminate between these data and those from D2.

We followed the comment and modified the figure as shown below:

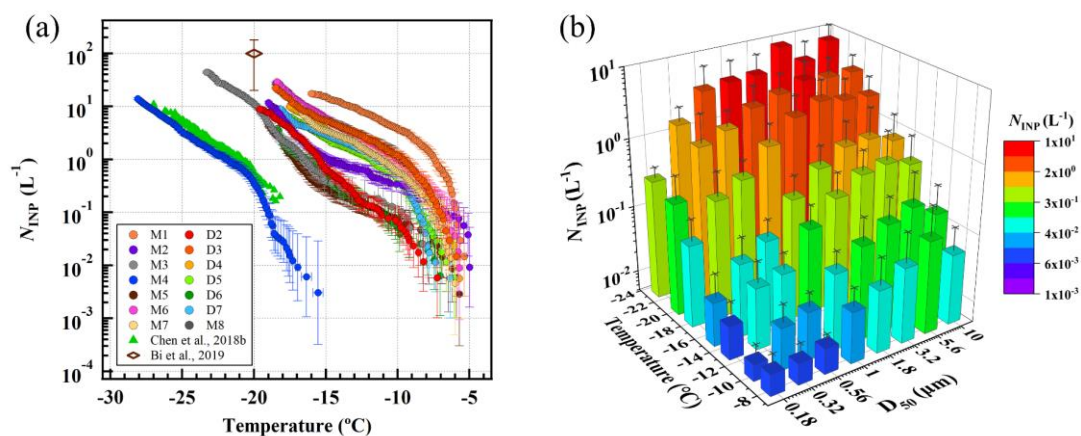

Figure R2.4. Modified Fig. 2
